# Supplementary material for: Flapping motion of onset aurora
Source: Copernicus journal article supplement (doi:10.5194/egusphere-2026-11), 2026-01-30
Supplement: Supplementary file [file egusphere-2026-11-AC2-supplement.pdf]

## First one-min-interval of Pi2 onset

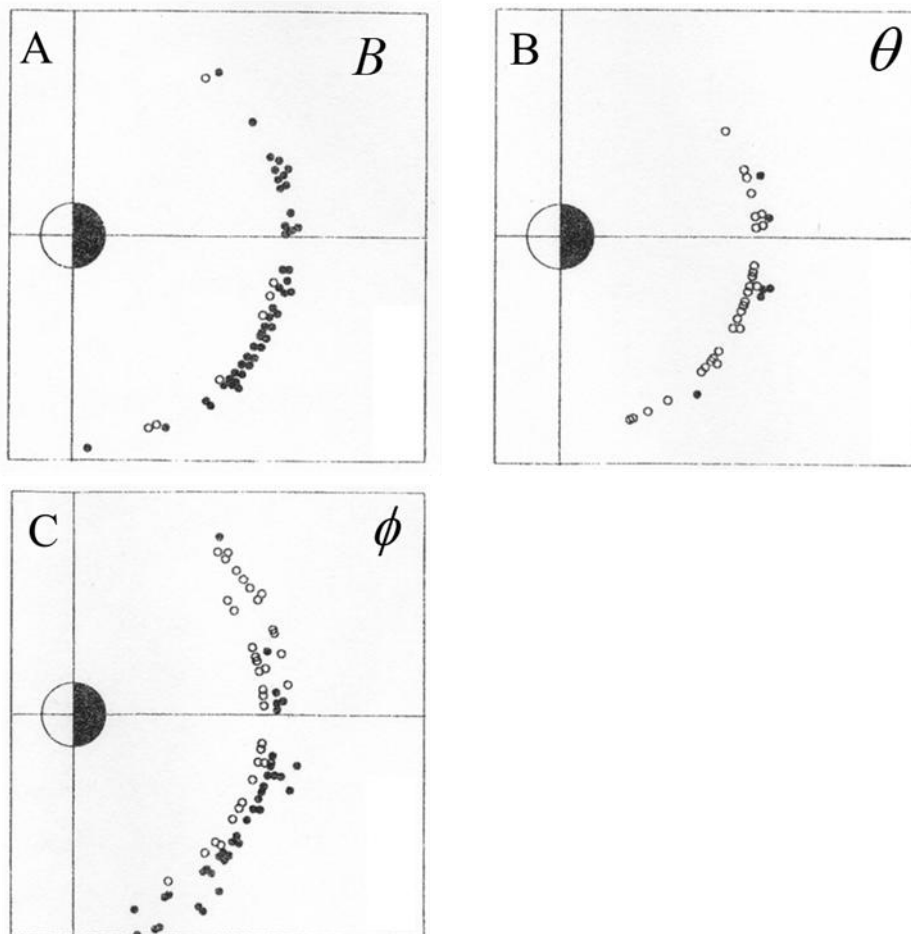

**Figure A**

Local time distribution of the initial change of the field lines at Pi2 onset measured along the geosynchronous orbit. **(A)** the change of field magnitude ( $B$ ) (black: decrease; white: increase), **(B)** the change of inclination angle ( $\theta$ ) (black: inclination decrease; white: inclination increase), **(C)** the change of field line rotation ( $\Phi$ ) (black: clockwise rotation; white: counterclockwise rotation viewed from above the equatorial plane).

Adapted from Saka et al, (2000)
